# Supplementary material
Source: PubMed Central journal article supplement (PMC3686116)
Supplement: NIHMS477380-supplement-01.pdf [file NIHMS477380-supplement-01.pdf]

1

|                 |                 | <b>01/01/2010</b>                    |
|-----------------|-----------------|--------------------------------------|
| <b>Sex</b>      | <b>Age</b>      |                                      |
| Females         | 0-3             | 0 (0.0)                              |
|                 | 4-18            | 26 (164.2)                           |
|                 | 19-44           | 61 (214.9)                           |
|                 | 45-64           | 56 (352.8)                           |
|                 | 65+             | 33 (360.3)                           |
|                 | <b>All ages</b> | <b>247.9</b><br><b>(211.2,284.7)</b> |
|                 | Males           | 0-3                                  |
| 4-18            |                 | 15 (89.3)                            |
| 19-44           |                 | 19 (68.7)                            |
| 45-64           |                 | 33 (220.9)                           |
| 65+             |                 | 17 (268.4)                           |
| <b>All ages</b> |                 | <b>135.4</b><br><b>(105.9,165.0)</b> |
| Total           |                 | 0-3                                  |
|                 | 4-18            | 41 (125.6)                           |
|                 | 19-44           | 79 (141.0)                           |
|                 | 45-64           | 89 (288.8)                           |
|                 | 65+             | 50 (322.7)                           |
|                 | <b>All ages</b> | <b>192.6</b><br><b>(169.0,216.3)</b> |

2 Age-specific results summarized with count and prevalence rate (per 100,000 person-years; unadjusted),  
3 while bolded across-all-age results are described with the age-adjusted (and sex-adjusted for "Total"  
4 section) prevalence rates and 95% confidence intervals (per 100,000 person-years adjusted to the US White  
5 population in 2000).

6
